# Supplementary material for: Studies on Quality of Joints and Phenomena Therein for Welded Vehicle Components Made of Aluminium Alloy – a Review
Source: Preprints.org preprint supplement (doi:10.20944/preprints202403.1458.v1), 2024-03-25
Supplement: Supplementary file 1 [file supplementary]

1. AA - artificial aging
2. AGG - abnormal grain growth
3. AGS - average grain size
4. AR - as-received
5. ARBed - accumulative roll-bonded
6. AS - advancing side
7. BM - base metal
8. BMW - base material welded
9. BMZ - base material zone
10. BP - button pullout
11. CFRPs - carbon fiber reinforced plastics
12. CET - columnar to equiaxed transition
13. CLD - cold lap defect
14. CMT - cold metal transfer
15. DC - direct current
16. DPGMAW - double pulse gas metal arc welding
17. DXZs - dynamically recrystallized zones
18. DSAW - double-sided double-arc welding
19. DSFSW - double spot friction stir welding
20. DSZFSW - double spot zigzag friction stir welding
21. EB - electron beam
22. EBSD - electron backscatter diffraction
23. EBW - electron beam welding
24. EXW - explosive welding
25. FCG - fatigue crack growth
26. FCP - fatigue crack propagation
27. FSP - friction stir processing
28. FSLW - friction stir lap welding
29. FSW - friction stir welding
30. FSSWed - friction stir spot welded
31. FZs - fusion zones
32. FSWed - friction stir welded
33. GMA - gas metal arc
34. GP zones - Guinier-Preston zones
35. GMAW - gas metal arc welding
36. GTAW - gas-tungsten-arc welding
37. HAZ - heat affected zone
38. HD - hook defect
39. HSS - high-strength steel
40. HTAW - heat treatment after welding
41. HTBW - heat treatment before welding
42. JI -J integral
43. KI - stress intensity factor
44. LADSW - laser double sided welding
45. LB - laser beam
46. LBW - laser beam welded
47. LIW - laser impact welding
48. MCZ - material concentrated zone
49. MIG - metal inert gas
50. MMCs - metal matrix composites
51. MPW - magnetic pulse welding
52. MPWed – magnetic pulse welded
53. NA - natural ageing
54. NZ - nugget zone
55. NVEB – nonvacuum electron beam
56. PAW - plasma arc welding
57. PB - paint baking
58. PCMT - pulsed cold metal transfer
59. PFHT - post form heat treatment
60. PGMAW - pulse gas metal arc welding
61. PWHT - post weld heat treatment
62. PM - parent material
63. PMZ - partially melted zone
64. RFSP - reverse of rotation of stir processing
65. RP - revolutionary pitch
66. RS - retreating side
67. RSW - resistance spot welding
68. RWF - reciprocating wire feeding
69. SCR - silicon controlled rectifier
70. SCC - stress corrosion cracking
71. SWed – stir welded
72. SFSSW - swept friction stir spot welding
73. STC - straight cylindrical
74. SZ - stir zone
75. TAC - tapered cylindrical
76. THC - threaded cylindrical
77. TIG - tungsten inert gas
78. TMAZ - thermo mechanically affected zone
79. TRS - tool rotational speed
80. TWBs - tailor welded blanks
81. UFG - ultrafine grain
82. UFGed - ultrafine grained
83. UFM - unaffected material
84. UFSW - underwater friction stir weld
85. UFSWed – underwater friction stir welded
86. UTS - ultimate tensile strength
87. VFA - vaporizing foil actuator
88. VFAW - vaporizing foil actuator welding
89. WAAM - wire arc additive manufacturing
90. WN - weld nugget
91. WNZ - weld nugget zone
92. WS - welding speed
93. WZ – welded zone
